# Supplementary material for: High thermoelectric performance of polycrystalline In4Se3−δ(CuI)x: synergistic effects of the Se-deficiency and CuI-doping
Source: Royal Society of Chemistry journal article supplement (doi:10.1039/c6qi00340k), 2016-01-01
Supplement: c6qi00340k1.pdf [file c6qi00340k1.pdf]

## Electronic Supplementary Information

### High Thermoelectric Performance of Polycrystalline $\text{In}_4\text{Se}_{3-\delta}(\text{CuI})_x$ : Synergistic Effect of Se-deficiency and CuI-doping

Yan-chun Chen,<sup>b</sup> Hua Lin,<sup>b</sup> Li-Ming Wu<sup>\*a</sup>

<sup>a</sup> Key Laboratory of Theoretical and Computational Photochemistry, Ministry of Education, College of Chemistry, Beijing Normal University, Beijing 100875, People's Republic of China.

<sup>b</sup> Key Laboratory of Optoelectronic Materials Chemistry and Physics, Fujian Institute of Research on the Structure of Matter, Chinese Academy of Sciences, Fuzhou, Fujian 350002, P. R. China.

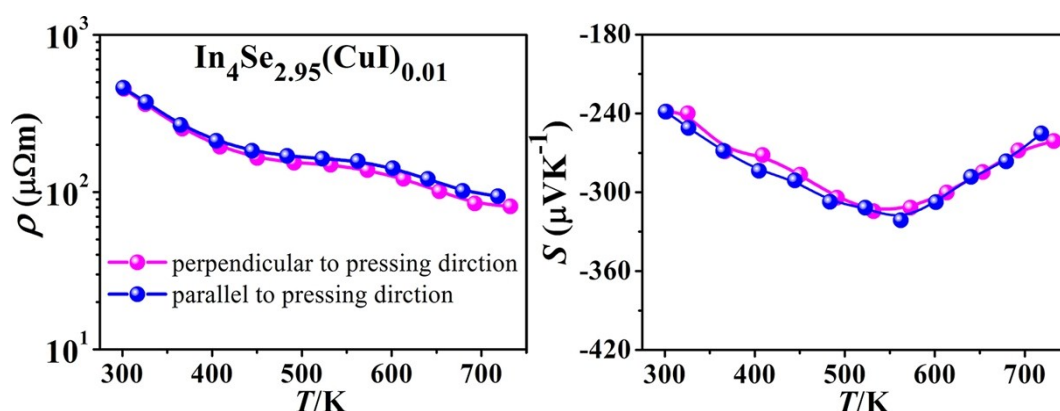

Figure S1. Temperature-dependent electrical resistivity ( $\rho$ ) and Seebeck coefficient ( $S$ ) of the  $\text{In}_4\text{Se}_{2.95}(\text{CuI})_{0.01}$  compound from sections parallel and perpendicular to the pressing direction.
